# Supplementary material for: Biomimicking the structure of silk fibers via cellulose nanocrystal as β-sheet crystallite
Source: Royal Society of Chemistry journal article supplement (doi:10.1039/c4ra01284d), 2014-01-01
Supplement: c4ra01284d1.pdf [file c4ra01284d1.pdf]

## Supplementary material

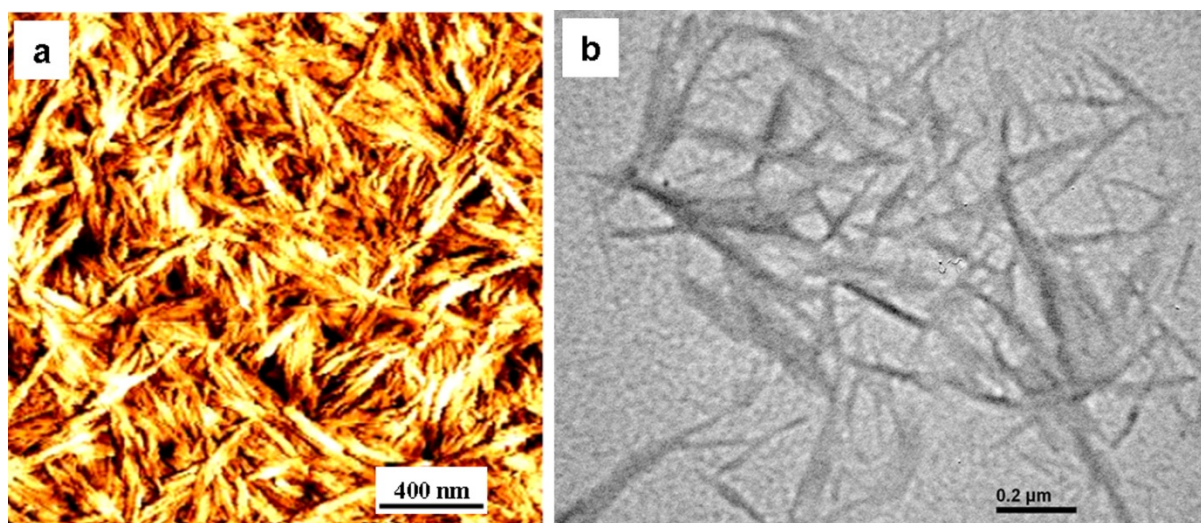

Fig. S1. AFM and TEM images of CNC.

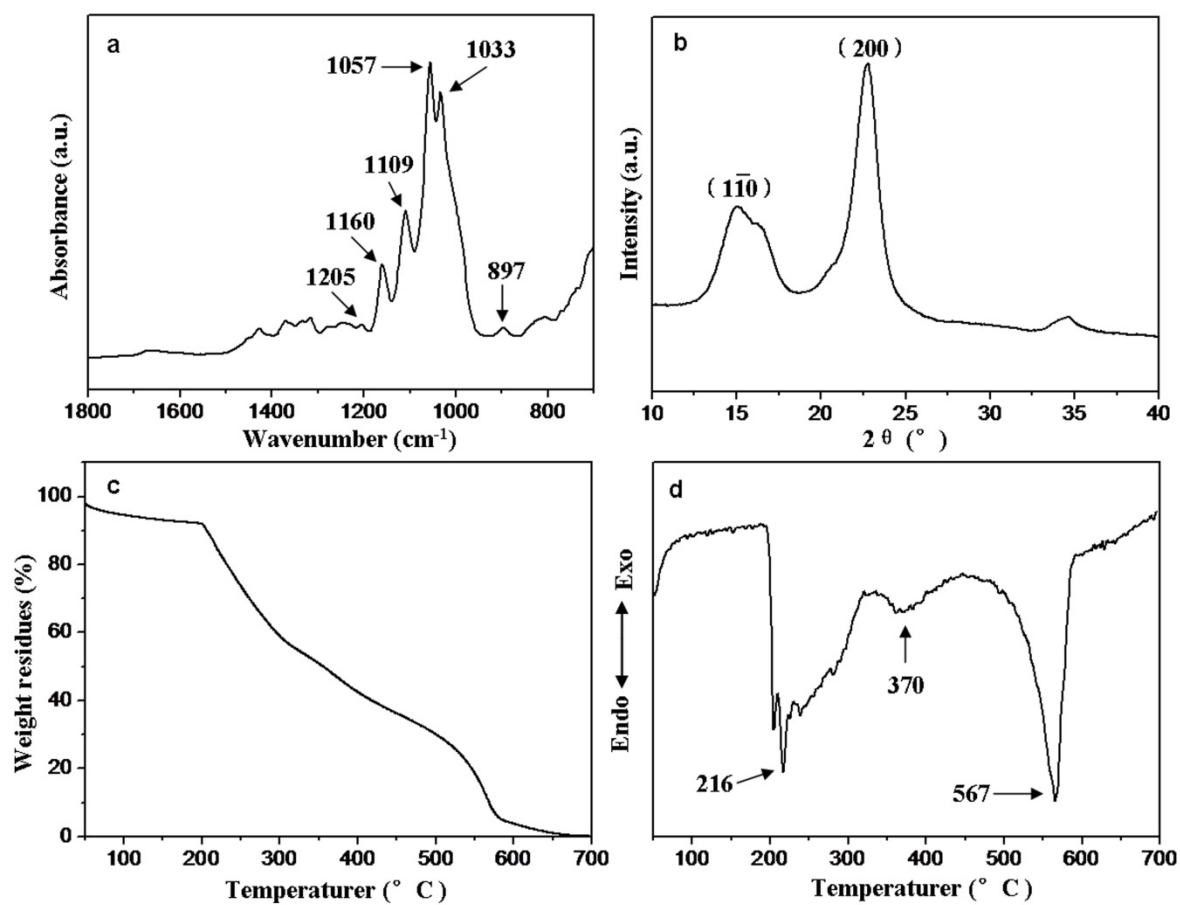

Fig. S2. FTIR spectra (a), XRD patterns (b), TGA (c) and DTG (d) curves of CNC.

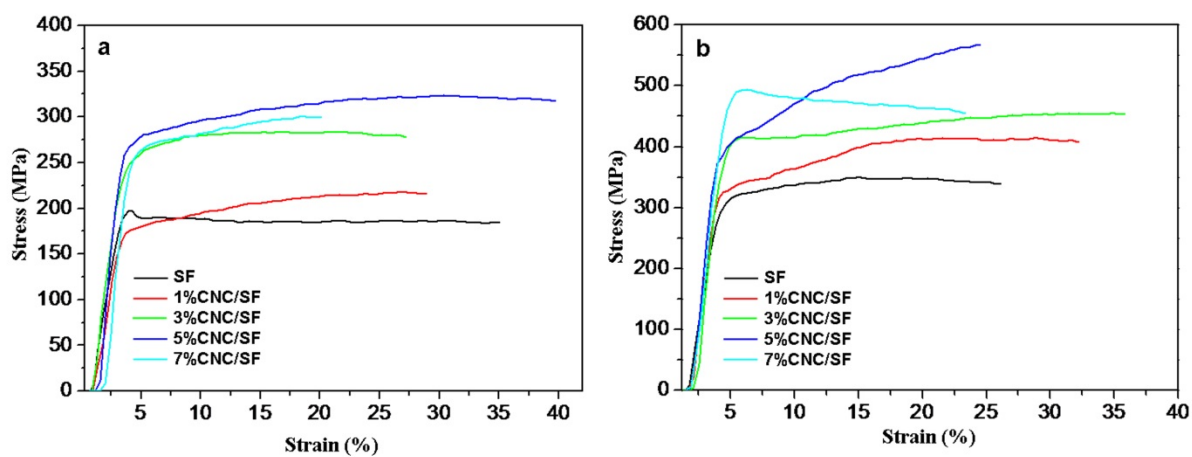

**Fig. S3.** Stress-strain curves of regenerated SF fibers and various CNC/SF fibers with 1X (a) and 2X (b) of post draw.
